# Supplementary material
Source: PubMed Central journal article supplement (PMC3254146)
Supplement: NIHMS347355-supplement-01.pdf [file NIHMS347355-supplement-01.pdf]

**Supplemental Table 1**  
**Fatty acid composition of experimental diets fed to Ossabaw pigs†**

| Fatty acids | Control Diet       |   | Atherogenic Diet |   |                    | M-Ath Diet |      |                    | ANOVA P value |      |        |
|-------------|--------------------|---|------------------|---|--------------------|------------|------|--------------------|---------------|------|--------|
|             |                    | ± |                  | ± |                    |            | ±    |                    |               |      |        |
| 5:0         | n.d. <sup>b</sup>  | ± | n.d.             |   | n.d. <sup>b</sup>  | ±          | n.d. | 0.18 <sup>a</sup>  | ±             | 0.05 | 0.0002 |
| 7:0         | n.d. <sup>b</sup>  | ± | n.d.             |   | n.d. <sup>b</sup>  | ±          | n.d. | 2.32 <sup>a</sup>  | ±             | 0.49 | <.0001 |
| 8:0         | n.d.               | ± | n.d.             |   | 0.08               | ±          | 0.15 | 0.58               | ±             | 1.01 | 0.47   |
| 10:0        | n.d. <sup>b</sup>  | ± | n.d.             |   | n.d. <sup>b</sup>  | ±          | n.d. | 1.79 <sup>a</sup>  | ±             | 0.46 | 0.0002 |
| 12:0        | 0.01 <sup>b</sup>  | ± | 0.02             |   | 0.07 <sup>b</sup>  | ±          | 0.03 | 13.46 <sup>a</sup> | ±             | 2.76 | <.0001 |
| 14:0        | 0.15 <sup>b</sup>  | ± | 0.04             |   | 0.14 <sup>b</sup>  | ±          | 0.04 | 5.21 <sup>a</sup>  | ±             | 0.34 | <.0001 |
| 15:0        | 0.03               | ± | 0.03             |   | n.d.               | ±          | n.d. | n.d.               | ±             | n.d. | 0.09   |
| 16:0        | 14.22              | ± | 1.75             |   | 11.86              | ±          | 0.79 | 13.53              | ±             | 0.56 | 0.11   |
| 16:1t       | 0.17 <sup>a</sup>  | ± | 0.01             |   | 0.02 <sup>c</sup>  | ±          | 0.03 | 0.09 <sup>b</sup>  | ±             | 0.01 | 0.001  |
| 16:1n7      | 0.25 <sup>b</sup>  | ± | 0.03             |   | 0.16 <sup>c</sup>  | ±          | 0.03 | 0.50 <sup>a</sup>  | ±             | 0.02 | <.0001 |
| 17:0        | 0.07               | ± | 0.06             |   | 0.13               | ±          | 0.01 | 0.14               | ±             | 0.01 | 0.01   |
| 18:0        | 2.62 <sup>c</sup>  | ± | 0.15             |   | 14.39 <sup>a</sup> | ±          | 0.21 | 10.09 <sup>b</sup> | ±             | 0.81 | <.0001 |
| 18:1t       | n.d. <sup>c</sup>  | ± | n.d.             |   | 9.37 <sup>a</sup>  | ±          | 0.55 | 4.46 <sup>b</sup>  | ±             | 0.26 | <.0001 |
| 18:1n9      | 21.26 <sup>c</sup> | ± | 0.61             |   | 35.57 <sup>a</sup> | ±          | 0.79 | 27.44 <sup>b</sup> | ±             | 2.10 | <.0001 |
| 18:1n7      | 0.95 <sup>c</sup>  | ± | 0.03             |   | 6.21 <sup>a</sup>  | ±          | 0.21 | 3.82 <sup>b</sup>  | ±             | 0.29 | <.0001 |
| 18:1        | n.d. <sup>c</sup>  | ± | n.d.             |   | 4.70 <sup>a</sup>  | ±          | 0.19 | 2.72 <sup>b</sup>  | ±             | 0.20 | <.0001 |
| 18:2n6      | 54.45 <sup>a</sup> | ± | 0.70             |   | 12.02 <sup>b</sup> | ±          | 0.75 | 9.77 <sup>c</sup>  | ±             | 0.60 | <.0001 |
| 18:3n3      | 4.78 <sup>a</sup>  | ± | 0.06             |   | 0.62 <sup>c</sup>  | ±          | 0.09 | 0.90 <sup>b</sup>  | ±             | 0.05 | <.0001 |
| 20:0        | 0.29               | ± | 0.07             |   | 0.31               | ±          | 0.02 | 0.22               | ±             | 0.02 | 0.08   |
| 20:1n9      | 0.20 <sup>a</sup>  | ± | 0.05             |   | 0.08 <sup>b</sup>  | ±          | 0.01 | 0.21 <sup>a</sup>  | ±             | 0.02 | 0.004  |
| 20:2n6      | 0.02 <sup>b</sup>  | ± | 0.03             |   | n.d. <sup>b</sup>  | ±          | n.d. | 0.12 <sup>a</sup>  | ±             | 0.02 | 0.001  |
| 20:4n6      | n.d.               | ± | n.d.             |   | n.d.               | ±          | n.d. | 0.03               | ±             | 0.03 | 0.08   |
| 22:0        | 0.23               | ± | 0.06             |   | 0.22               | ±          | 0.09 | 0.16               | ±             | 0.02 | 0.38   |
| 22:1n9      | 0.10               | ± | 0.08             |   | n.d.               | ±          | n.d. | n.d.               | ±             | n.d. | 0.08   |
| TOTS        | 17.63 <sup>c</sup> | ± | 1.50             |   | 27.21 <sup>b</sup> | ±          | 0.84 | 47.68 <sup>a</sup> | ±             | 3.69 | <.0001 |
| TOTM        | 22.92 <sup>c</sup> | ± | 0.68             |   | 56.10 <sup>a</sup> | ±          | 1.42 | 39.23 <sup>b</sup> | ±             | 2.87 | <.0001 |
| PUFA        | 59.25 <sup>a</sup> | ± | 0.80             |   | 12.64 <sup>b</sup> | ±          | 0.85 | 10.82 <sup>b</sup> | ±             | 0.69 | <.0001 |
| n-6 PUFA    | 54.47 <sup>a</sup> | ± | 0.73             |   | 12.02 <sup>b</sup> | ±          | 0.75 | 9.93 <sup>c</sup>  | ±             | 0.64 | <.0001 |
| n-3 PUFA    | 4.78 <sup>a</sup>  | ± | 0.06             |   | 0.62 <sup>c</sup>  | ±          | 0.09 | 0.90 <sup>b</sup>  | ±             | 0.05 | <.0001 |
| TOTS/TOTM   | 0.77 <sup>b</sup>  | ± | 0.09             |   | 0.49 <sup>b</sup>  | ±          | 0.03 | 1.22 <sup>a</sup>  | ±             | 0.19 | 0.0009 |
| TOTM/PUFA   | 0.39 <sup>c</sup>  | ± | 0.01             |   | 4.46 <sup>a</sup>  | ±          | 0.41 | 3.62 <sup>b</sup>  | ±             | 0.05 | <.0001 |
| TOTS/PUFA   | 0.30 <sup>c</sup>  | ± | 0.03             |   | 2.16 <sup>b</sup>  | ±          | 0.11 | 4.43 <sup>a</sup>  | ±             | 0.65 | <.0001 |
| n-6/n-3     | 11.41 <sup>b</sup> | ± | n.d.             |   | 19.71 <sup>a</sup> | ±          | 1.80 | 11.06 <sup>b</sup> | ±             | 0.08 | <.0001 |

Values in rows with different superscript letters are significantly different by one-way ANOVA. The superscripts indicate what mean values are different in the rows and the P values are for all groups. n = 3 for Control Diet, Atherogenic and M-Ath diets. Fructose diet not analyzed.

**Supplemental Table 2**  
**Correlation of fatty acid composition among diet, serum and liver samples**

|               | Serum level |              | Liver level |              |
|---------------|-------------|--------------|-------------|--------------|
|               | <i>r</i>    | <b>p-val</b> | <i>r</i>    | <b>p-val</b> |
| Diet SFA      | -0.248      | 0.5          | -0.27       | 0.47         |
| Diet TFA      | 0.34        | 0.3          | 0.59        | 0.09         |
| Diet MUFA     | 0.77        | 0.01         | 0.92        | < .001       |
| Diet PUFA     | 0.95        | < .001       | 0.98        | < .001       |
| Diet n-6 PUFA | 0.95        | < .001       | 0.99        | < .001       |
| Diet n-3 PUFA | 0.88        | 0.002        | 0.59        | 0.09         |
| Diet n-6/n-3  | 0.51        | 0.15         | -0.10       | 0.79         |

|                | Liver level |              |
|----------------|-------------|--------------|
|                | <i>r</i>    | <b>p-val</b> |
| Serum SFA      | 0.84        | < .001       |
| Serum TFA      | 0.32        | 0.047        |
| Serum MUFA     | 0.84        | < .001       |
| Serum PUFA     | 0.84        | < .001       |
| Serum n-6 PUFA | 0.82        | < .001       |
| Serum n-3 PUFA | 0.89        | < .001       |
| Serum n-6/n-3  | 0.88        | < .001       |

SFA: Saturated Fatty Acids, TFA: Trans Fatty Acids, MUFA: Monounsaturated Fatty Acids, PUFA: Polyunsaturated Fatty Acids.

**Supplemental Table 3**  
**Selected characteristics at sacrifice of gender–matched pigs belonging to different study groups†**

|                                | <b>Control chow group (n = 9)</b> | <b>Atherogenic group (n = 8)</b> | <b>M-ATG group (n = 7)</b> |
|--------------------------------|-----------------------------------|----------------------------------|----------------------------|
| Gender (M/F)                   | 0/9                               | 0/8                              | 0/7                        |
| Weight at sacrifice (kg)       | 50.6 ±6.1                         | 89.9 ±12.3 <sup>a</sup>          | 87.2 ±12.6 <sup>a</sup>    |
| Mean weight gain (kg)          | 13.0 ±3.5                         | 47.1 ±14.6 <sup>a</sup>          | 37.7 ±11.8 <sup>a</sup>    |
| Body circumference at sac (cm) | 81.5 ±4.5                         | 115.4 ±1.9 <sup>a</sup>          | 121.9 ±9.2 <sup>a,b</sup>  |
| <b>Serum Chemistry Profile</b> |                                   |                                  |                            |
| AST (IU/L)                     | 32 ±3                             | 27 ±2                            | 100 ±18 <sup>a,b</sup>     |
| ALT (IU/L)                     | 46 ±8                             | 32 ±2                            | 41 ±10                     |
| Alkaline Phos (IU/L)           | 57 ±5                             | 100 ±14 <sup>a</sup>             | 273 ±96 <sup>a</sup>       |
| Bilirubin (mg/dL)              | 0.2 ±0.02                         | 0.2 ±0.03                        | 0.3 ±0.04                  |
| <b>Serum glyceic measures</b>  |                                   |                                  |                            |
| Glucose, fasting (mg/dL)       | 75.6 ±2.5                         | 85.9 ±2.8 <sup>a</sup>           | 87.4 ±5.2 <sup>a</sup>     |
| Insulin, fasting serum ±mg/dL  | 11 ±2                             | 14 ±1                            | 18 ±3                      |
| HOMA                           | 2.1 ± 0.3                         | 2.9 ± 0.4                        | 3.9 ± 0.7                  |
| <b>Plasma Lipids</b>           |                                   |                                  |                            |
| Cholesterol (mg/dL)            | 81.7 ±3.2                         | 375.3 ±39.6 <sup>a</sup>         | 643.2 ±67.2 <sup>a,b</sup> |
| Triglycerides (mg/dL)          | 25.5 ±3.3                         | 37.5 ±2.4 <sup>a</sup>           | 120.3 ±18.3 <sup>a,b</sup> |
| LDL (mg/dL)                    | 32.9 ±4.0                         | 195.9 ±52.0 <sup>a</sup>         | 533.8 ±63.9 <sup>a,b</sup> |
| HDL (mg/dL)                    | 43.6 ± 4.0                        | 65.6 ±12.9 <sup>a</sup>          | 85.3 ±5.5 <sup>a</sup>     |
| NEFA (serum) (mmol/L)          | 0.48 ± 0.18                       | 0.96 ±0.176                      | 1.03 ± 0.32                |
| <b>Serum Hormones</b>          |                                   |                                  |                            |
| Adiponectin, serum (qauc)Ψ     | 16273 ±1530                       | 13359 ±813                       | 13296 ±663                 |
| Leptin, serum (ng/dL)          | 2 ±0.2                            | 4 ±1 <sup>a</sup>                | 17 ±4 <sup>a,b</sup>       |
| TNF-α, serum (pg/mL)           | 46.0 ±5.5                         | 38.8 ±2.2                        | 72.9 ±19.5 <sup>b</sup>    |
| <b>Serum MDA (uM)</b>          |                                   |                                  |                            |
|                                | 1.50 ±0.11                        | 2.05 ±0.32 <sup>a</sup>          | 3.00 ±1.17                 |

†Data shown as mean ± s.e. <sup>a</sup>p<0.05 when compared to Control Chow group, <sup>b</sup>p<0.05 when compared to atherogenic diet group. <sup>Ψ</sup> Expressed as protein intensity. AST: Aspartate aminotransferase, ALT: Alanine aminotransferase, HOMA: Homeostatic Model Assessment Method, LDL: Low density lipoprotein, HDL: High density lipoprotein, NEFA: Non-esterified fatty acids, TNFα: Tumor necrosis factor-α, MDA: Malondialdehyde

**Supplemental Table 4**  
**Triglyceride, MDA and TEAC Measurements in Liver Tissue of gender-**  
**matched pigs<sup>†</sup>**

|                                          | <b>Control<br/>(n = 9)</b> | <b>Atherogenic diet<br/>(n = 8)</b> | <b>M-Ath<br/>(n = 7)</b> |
|------------------------------------------|----------------------------|-------------------------------------|--------------------------|
| <b>Triglycerides<br/>(ug/mg protein)</b> | 52 ±4                      | 121 ±29 <sup>a</sup>                | 110 ±19 <sup>a</sup>     |
| <b>MDA<br/>(nmol/pg)</b>                 | 0.23 ±0.01                 | 0.42 ±0.07                          | 0.56 ±0.08 <sup>a</sup>  |
| <b>TEAC<br/>(umol/mg protein)</b>        | 0.27 ±0.01                 | 0.30 ±0.01                          | 0.33 ±0.01 <sup>a</sup>  |
| <b>MDA/TEAC</b>                          | 0.83 ±0.18                 | 1.42 ±0.21                          | 1.67 ±0.21 <sup>a</sup>  |

<sup>†</sup>Values represent means (s.e.). MDA: Malondialdehyde, TEAC: Trolox Equivalent Antioxidant Capacity. <sup>a</sup> p<0.05 when compared to Control group, <sup>b</sup> p<0.05 when compared to Atherogenic group.
